# Supplementary material
Source: MDPI journal article supplement (https://www.mdpi.com/2073-8994/14/5/1009)
Supplement: s1 [file s1]

Suppl. Table S1: Links between Gene Ontology (GO) terms and Cancer Hallmarks. Individual GO terms were manually associated with the hallmarks of cancer, constituting a resource for relating the identified communities in the MAPK network with individual hallmarks of cancer.

| GO Term                                          | Cancer Hallmark |
|--------------------------------------------------|-----------------|
| Term includes "regulation of cell proliferation" | H1              |
| Term includes "development" of any tissues       | H1              |
| Term includes "response to stimulus"             | H2              |
| "regulation of cell death"                       | H3              |
| Term includes "apoptosis"                        | H3              |
| Term includes "programmed cell death"            | H3              |
| Term includes "cell cycle"                       | H4              |
| "senescence"                                     | H4              |
| "primitive erythrocyte differentiation"          | H5              |
| "primitive hemopoiesis"                          | H5              |
| Term includes "blood vessel"                     | H5              |
| Term includes "vascular"                         | H5              |
| Term includes "angiogenesis"                     | H5              |
| Term includes "cell migration"                   | H6              |
| Term includes "chemotaxis"                       | H6              |
| Term includes "taxis"                            | H6              |
| Term includes "cell-matrix adhesion"             | H6              |
| Term includes "metabolic"                        | H7              |
| Term includes "inflammatory"                     | H8              |
| Term includes name of an immune cell             | H8              |
