# Supplementary material
Source: MDPI journal article supplement (https://www.mdpi.com/2073-8994/14/5/1009)
Supplement: s1 [file s1]

Suppl. Table S2: Betweenness Centrality and Clustering Coefficient metrics for each gene in the MAPK network.

| Gene     | Betweenness | Clustering |
|----------|-------------|------------|
| ERK      | 788.335     | 0.056      |
| p38      | 501.124     | 0.000      |
| JNK      | 122.800     | 0.000      |
| p53      | 356.119     | 0.000      |
| p21      | 0.000       | 0.000      |
| TGFBR    | 0.000       | 0.000      |
| EGFR     | 165.167     | 0.056      |
| FGFR3    | 13.390      | 0.250      |
| ATM      | 0.000       | 0.000      |
| TAOK     | 30.333      | 0.000      |
| MAX      | 13.352      | 0.000      |
| GRB2     | 139.729     | 0.038      |
| FRS2     | 53.155      | 0.200      |
| PI3K     | 186.408     | 0.056      |
| AP1      | 258.333     | 0.000      |
| PPP2CA   | 161.000     | 0.000      |
| MEK1_2   | 786.335     | 0.050      |
| DUSP1    | 116.333     | 0.000      |
| MYC      | 118.476     | 0.000      |
| AKT      | 329.367     | 0.014      |
| PLCG     | 149.129     | 0.167      |
| PKC      | 15.675      | 0.167      |
| GADD45   | 172.000     | 0.000      |
| ELK1     | 19.267      | 0.083      |
| FOS      | 109.333     | 0.100      |
| ATF2     | 34.667      | 0.000      |
| JUN      | 26.333      | 0.000      |
| MSK      | 255.162     | 0.000      |
| CREB     | 182.333     | 0.000      |
| RSK      | 173.000     | 0.167      |
| SMAD     | 2.000       | 0.000      |
| MTK1     | 174.000     | 0.000      |
| SPRY     | 223.333     | 0.000      |
| RAF      | 233.993     | 0.050      |
| GAB1     | 23.614      | 0.000      |
| PDK1     | 173.742     | 0.167      |
| p70      | 51.375      | 0.167      |
| p14      | 120.476     | 0.000      |
| FOXO3    | 0.000       | 0.000      |
| RAS      | 250.287     | 0.050      |
| SOS      | 241.948     | 0.083      |
| MDM2     | 198.333     | 0.000      |
| BCL2     | 0.000       | 0.000      |
| TAK1     | 25.333      | 0.000      |
| MAP3K1_3 | 187.932     | 0.000      |
| PTEN     | 151.000     | 0.000      |
| HIF1     | 86.000      | 0.083      |
| EGF      | 0.000       | 0.000      |
| VEGF     | 0.000       | 0.000      |
