# Supplementary material
Source: MDPI journal article supplement (https://www.mdpi.com/2073-8994/14/5/1009)
Supplement: s1 [file s1]

Suppl. Table S3: The MAPK network adjacency matrix as a table of edges.

| Source Gene | Destination Gene | Source Gene | Destination Gene |
|-------------|------------------|-------------|------------------|
| ERK         | ELK1             | AKT         | p21              |
| ERK         | FOS              | AKT         | MYC              |
| ERK         | MSK              | AKT         | RAF              |
| ERK         | RSK              | AKT         | p70              |
| ERK         | SPRY             | AKT         | FOXO3            |
| ERK         | RAF              | AKT         | MDM2             |
| ERK         | p70              | AKT         | BCL2             |
| ERK         | HIF1             | PLCG        | PKC              |
| p38         | p53              | PLCG        | RAS              |
| p38         | MAX              | PKC         | EGFR             |
| p38         | PPP2CA           | PKC         | FGFR3            |
| p38         | ELK1             | PKC         | RAF              |
| p38         | ATF2             | GADD45      | MTK1             |
| p38         | MSK              | ELK1        | FOS              |
| JNK         | ELK1             | FOS         | AP1              |
| JNK         | ATF2             | ATF2        | AP1              |
| JNK         | JUN              | JUN         | AP1              |
| JNK         | FOXO3            | MSK         | MYC              |
| p53         | p21              | MSK         | CREB             |
| p53         | GADD45           | CREB        | DUSP1            |
| p53         | MDM2             | CREB        | FOS              |
| p53         | PTEN             | CREB        | BCL2             |
| TGFBR       | GRB2             | RSK         | FOS              |
| TGFBR       | SMAD             | RSK         | SOS              |
| TGFBR       | TAK1             | SMAD        | GADD45           |
| EGFR        | GRB2             | MTK1        | p38              |
| EGFR        | PLCG             | MTK1        | JNK              |
| FGFR3       | FRS2             | SPRY        | EGFR             |
| FGFR3       | PLCG             | SPRY        | FRS2             |
| ATM         | p53              | RAF         | MEK1_2           |
| ATM         | TAOK             | GAB1        | PI3K             |
| TAOK        | p38              | PDK1        | AKT              |
| TAOK        | JNK              | PDK1        | p70              |
| MAX         | MYC              | p70         | HIF1             |
| GRB2        | EGFR             | p14         | MDM2             |
| GRB2        | FGFR3            | RAS         | PI3K             |
| GRB2        | FRS2             | RAS         | RAF              |
| GRB2        | GAB1             | RAS         | MAP3K1_3         |
| GRB2        | SOS              | SOS         | PI3K             |
| FRS2        | GRB2             | SOS         | RAS              |
| PI3K        | GAB1             | MDM2        | p53              |
| PI3K        | PDK1             | TAK1        | p38              |
| AP1         | MEK1_2           | TAK1        | JNK              |
| PPP2CA      | MEK1_2           | MAP3K1_3    | p38              |
| MEK1_2      | ERK              | MAP3K1_3    | JNK              |
| DUSP1       | p38              | MAP3K1_3    | MEK1_2           |
| DUSP1       | JNK              | PTEN        | AKT              |
| MYC         | p14              | HIF1        | EGF              |
|             |                  | HIF1        | VEGF             |
